# Supplementary material
Source: MDPI journal article supplement (https://www.mdpi.com/2073-4441/14/22/3712)
Supplement: s1 [file s1]

Supplementary materials

# Evaluation of Nitrogen and Carbon Stable Isotopes in Filter Feeding Bivalves and Surficial Sediment for Assessing Aquatic Condition in Lakes and Estuaries

James L. Lake <sup>1,\*</sup>, Jonathan R. Serbst <sup>1</sup>, Anne Kuhn <sup>1</sup>, Michael Charpentier <sup>2</sup> and Nathan J. Smucker <sup>3</sup>

<sup>1</sup> US Environmental Protection Agency, Office of Research and Development, 27 Tarzwell Drive, Narragansett, RI, 02882, USA

<sup>2</sup> General Dynamics Information Technology, 27 Tarzwell Drive, Narragansett, RI, 02882, USA

<sup>3</sup> US Environmental Protection Agency, Office of Research and Development, 26 Martin Luther King Drive W., Cincinnati, OH, 45268, USA

\* Correspondence: lake.jim@epa.gov

**Table S1.** Location data for study lakes and watershed size (ha) for lakes and estuaries.

| Lake Name       | Lake Lat. | Lake Long. | Watershed size (ha) with water removed |
|-----------------|-----------|------------|----------------------------------------|
| <b>51 Lakes</b> |           |            |                                        |
| Alton           | 41.443162 | -71.718536 | 22570                                  |
| Asa             | 41.459212 | -71.513120 | 310                                    |
| Ashville        | 41.500854 | -71.756127 | 70                                     |
| Belleville      | 41.563214 | -71.480517 | 910                                    |
| Boone           | 41.583003 | -71.673801 | 570                                    |
| Bowdish         | 41.923120 | -71.774661 | 650                                    |
| Breakheart      | 41.598387 | -71.701314 | 1590                                   |
| Browning Mill   | 41.558071 | -71.689525 | 1410                                   |
| Burlingame      | 41.909663 | -71.745370 | 480                                    |
| Carbuncle       | 41.697874 | -71.773378 | 450                                    |
| Chapman         | 41.380264 | -71.794961 | 1840                                   |
| Deep            | 41.391267 | -71.662400 | 20                                     |
| Eisenhower      | 41.620902 | -71.716280 | 840                                    |
| GilbertS        | 41.635722 | -71.556017 | 1230                                   |
| Gorton          | 41.705270 | -71.458830 | 300                                    |
| Hundred         | 41.500151 | -71.542055 | 2360                                   |
| Indian          | 41.480009 | -71.468058 | 210                                    |
| Jamestown       | 41.531310 | -71.372326 | 80                                     |
| JL Curran       | 41.752465 | -71.549023 | 210                                    |
| Keech           | 41.879793 | -71.687589 | 1540                                   |
| Larkin          | 41.469520 | -71.558576 | 30                                     |
| Little          | 41.705795 | -71.406844 | 50                                     |
| Locustville     | 41.516659 | -71.721313 | 3270                                   |
| Lower Beach     | 41.571233 | -71.784443 | 160                                    |
| Meadowbrook     | 41.440659 | -71.690722 | 1590                                   |
| Mishnock        | 41.653108 | -71.588596 | 60                                     |
| Nonquint        | 41.564006 | -71.195182 | 1710                                   |
| OakSwamp        | 41.827830 | -71.540068 | 180                                    |
| Pasquisett      | 41.426073 | -71.631182 | 1190                                   |
| Quidnick        | 41.679780 | -71.678483 | 560                                    |
| Schoolhouse     | 41.400973 | -71.668023 | 410                                    |
| Secret          | 41.554608 | -71.478145 | 620                                    |
| Simmons Mill    | 41.539929 | -71.148572 | 380                                    |
| Spring Green    | 41.735011 | -71.409398 | 160                                    |
| Stafford        | 41.640217 | -71.156126 | 400                                    |
| Tarbox          | 41.635157 | -71.569088 | 410                                    |
| Tiogue          | 41.678282 | -71.550350 | 630                                    |
| Tucker          | 41.422160 | -71.551828 | 230                                    |
| Turner          | 41.837815 | -71.339272 | 13640                                  |
| Upper Dam       | 41.705572 | -71.552801 | 80                                     |

|                             |           |            |        |
|-----------------------------|-----------|------------|--------|
| UpperSlatersville           | 41.989944 | -71.596890 | 5030   |
| Wakefield                   | 41.963128 | -71.792426 | 390    |
| Wallum                      | 42.001032 | -71.765288 | 490    |
| Warwick                     | 41.723752 | -71.412675 | 380    |
| Watchaug                    | 41.384054 | -71.691207 | 1660   |
| Waterman                    | 41.876649 | -71.586161 | 1980   |
| Wilson                      | 41.969313 | -71.726221 | 2870   |
| Wincheck                    | 41.515939 | -71.771544 | 1030   |
| Worden's                    | 41.439087 | -71.574914 | 6210   |
| Wyoming                     | 41.519497 | -71.697449 | 15000  |
| Yawgoo                      | 41.511071 | -71.573107 | 400    |
| Nine Estuaries <sup>1</sup> |           |            |        |
| Bass River                  |           |            | 3830   |
| Great Island                |           |            | 7320   |
| Great Pond                  |           |            | 4960   |
| Little Pond                 |           |            | 620    |
| Mill Creek                  |           |            | 1100   |
| Narragansett Bay (RI + MA)  |           |            | 275000 |
| Ninigret Pond               |           |            | 3650   |
| Sage Lot Pond               |           |            | 250    |
| Three Bays                  |           |            | 6000   |

<sup>1</sup> Sample site locations for estuaries are in Supplemental Table 3

**Table S2.** Number, size data,  $\delta^{15}\text{N}$  and  $\delta^{13}\text{C}$  for Mussels (UN) from 26 Lakes.

|                    | Number    | Mean      | Minimum   | Maximum   | Mean                                       | Mean                                       |
|--------------------|-----------|-----------|-----------|-----------|--------------------------------------------|--------------------------------------------|
| Lake               | collected | length mm | Length mm | Length mm | $\delta^{15}\text{N}_{\text{UN}} \text{‰}$ | $\delta^{13}\text{C}_{\text{UN}} \text{‰}$ |
| Alton              | 6         | 70        | 53        | 83        | 8.2                                        | -32.8                                      |
| Belleville         | 6         | 89        | 64        | 110       | 9.3                                        | -30.9                                      |
| Browning Mill      | 4         | 86        | 78        | 94        | 6                                          | -32.4                                      |
| Chapman            | 2         | 75        | 72        | 78        | 9.4                                        | -31.3                                      |
| Eisenhower         | 10        | 85        | 65        | 100       | 4.5                                        | -31.5                                      |
| Gorton             | 4         | 84        | 78        | 92        | 12.1                                       | -28.6                                      |
| Hundred Acre       | 4         | 83        | 78        | 90        | 7.6                                        | -33.3                                      |
| Larkin             | 4         | 74        | 70        | 75        | 7.7                                        | -26.6                                      |
| Little             | 6         | 75        | 58        | 85        | 8.3                                        | -26                                        |
| Locustville        | 4         | 65        | 56        | 72        | 7                                          | -33.2                                      |
| Meadowbrook        | 6         | 71        | 56        | 89        | 7.5                                        | -30.8                                      |
| Mishnock           | 5         | 79        | 67        | 84        | 9.1                                        | -32.3                                      |
| Nonquint           | 9         | 68        | 60        | 87        | 8.4                                        | -28                                        |
| OakSwamp           | 5         | 69        | 55        | 80        | 7.8                                        | -28.7                                      |
| Pasquissett        | 3         | 54        | 49        | 61        | 5.8                                        | -32.9                                      |
| Quidnick           | 6         | 81        | 78        | 86        | 5.3                                        | -30.5                                      |
| School House       | 4         | 60        | 50        | 68        | 3.4                                        | -29.1                                      |
| Stafford           | 4         | 71        | 56        | 90        | 7                                          | -24.3                                      |
| Tiogue             | 4         | 75        | 68        | 81        | 12.2                                       | -26.7                                      |
| Tucker             | 12        | 66        | 50        | 85        | 3.8                                        | -29.3                                      |
| Turner             | 2         | 90        | 90        | 90        | 15.5                                       | -29.9                                      |
| Upper Dam          | 4         | 73        | 60        | 86        | 11.6                                       | -29.9                                      |
| Upper Slatersville | 20        | 73        | 63        | 87        | 9.6                                        | -31.8                                      |
| Wordens            | 5         | 51        | 47        | 56        | 6.8                                        | -30.5                                      |
| Wyoming            | 5         | 91        | 75        | 100       | 8                                          | -31.6                                      |
| Yawgoo             | 4         | 68        | 66        | 69        | 5.5                                        | -28.9                                      |

**Table S3.** Number, size data,  $\delta^{15}\text{N}$  and  $\delta^{13}\text{C}$  and sample site locations for *Mercenaria mercenaria* from a total of Estuaries 28 stations from nine Estuaries.

| Estuary      | Sample Site | Number Collected | Minimum length mm | Maximum length mm | Mean length mm | Mean $\delta^{15}\text{N}_{\text{MM}} \text{‰}$ | Mean $\delta^{13}\text{C}_{\text{MM}} \text{‰}$ | Site LAT  | Site LON   |
|--------------|-------------|------------------|-------------------|-------------------|----------------|-------------------------------------------------|-------------------------------------------------|-----------|------------|
| BassRiver    | Freydis     | 3                | 56                | 87                | 74             | 9.8                                             | -18.2                                           | 41.699613 | -70.166836 |
| BassRiver    | Thorwold    | 4                | 46                | 95                | 75             | 9.6                                             | -18.1                                           | 41.700126 | -70.167413 |
| BassRiver    | LEricson    | 4                | 46                | 108               | 77             | 9.7                                             | -18                                             | 41.700682 | -70.167941 |
| BassRiver    | Norseman    | 4                | 64                | 94                | 84             | 9.3                                             | -17.6                                           | 41.701101 | -70.168411 |
| GreatPond    | GPmassa     | 5                | 41                | 65                | 54             | 9.9                                             | -17.6                                           | 41.550954 | -70.585121 |
| GreatPond    | GPhiawa     | 6                | 42                | 55                | 51             | 10                                              | -17.7                                           | 41.553172 | -70.585372 |
| GreatPond    | GPcypress   | 4                | 57                | 68                | 63             | 10                                              | -17.8                                           | 41.559225 | -70.585828 |
| LittlePond   | LPoutlet    | 2                | 57                | 60                | 59             | 11.9                                            | -17.2                                           | 41.54678  | -70.788767 |
| LittlePond   | LPmassa     | 4                | 56                | 88                | 71             | 11.9                                            | -17.1                                           | 41.550561 | -70.588091 |
| LittlePond   | LPhiawa     | 3                | 60                | 80                | 73             | 12.2                                            | -17.3                                           | 41.552684 | -70.589049 |
| MillCreek    | MCsite 1    | 2                | 82                | 82                | 82             | 13.4                                            | -19.1                                           | 41.585727 | -71.449188 |
| NarrBay      | FtGetty     | 6                | 46                | 65                | 55             | 13                                              | -17.4                                           | 41.700126 | -70.167413 |
| Ninigret     | Nini1       | 4                | 45                | 64                | 54             | 7.4                                             | -17.8                                           | 41.34572  | -71.686952 |
| Ninigret     | Nini2       | 4                | 65                | 83                | 72             | 8.3                                             | -18.1                                           | 41.34667  | -71.684967 |
| Ninigret     | Nini3       | 4                | 38                | 80                | 56             | 7.5                                             | -18.8                                           | 41.347637 | -71.681362 |
| PtJudithPond | GalBoatRamp | 1                | 52                | 52                | 52             | 10.6                                            | -18.3                                           | 41.383207 | -71.507196 |
| PtJudithPond | BasinDrive  | 6                | 37                | 68                | 52             | 11.5                                            | -18.5                                           | 41.385583 | -71.509218 |
| PtJudithPond | EShoreDr    | 3                | 39                | 55                | 47             | 11.7                                            | -17.6                                           | 41.389817 | -71.499707 |
| PtJudithPond | FranksNeck  | 1                | 85                | 85                | 85             | 10.7                                            | -18.5                                           | 41.393099 | -71.498307 |
| SageLot      | sage1       | 4                | 52                | 80                | 64             | 7.9                                             | -18.4                                           | 41.551785 | -70.509256 |
| SageLot      | sage2       | 3                | 62                | 80                | 69             | 7.5                                             | -18.8                                           | 41.552302 | -70.507121 |
| SageLot      | sage3       | 5                | 50                | 78                | 63             | 7                                               | -18.7                                           | 41.552484 | -70.507857 |
| ThreeBays    | Seaview     | 2                | 60                | 65                | 63             | 9.6                                             | -19.6                                           | 41.609017 | -70.39992  |
| ThreeBays    | Cross       | 1                | 73                | 73                | 73             | 9.2                                             | -19.6                                           | 41.609327 | -70.434881 |
| ThreeBays    | CotuitTD    | 1                | 68                | 68                | 68             | 9.3                                             | -18.5                                           | 41.616451 | -70.43343  |
| ThreeBays    | Ropes       | 2                | 60                | 62                | 61             | 9.2                                             | -19.7                                           | 41.62049  | -70.433126 |
| ThreeBays    | BridgeSt    | 2                | 64                | 67                | 66             | 9.2                                             | -18.3                                           | 41.622095 | -70.393327 |
| ThreeBays    | BaySt       | 5                | 41                | 84                | 62             | 9.3                                             | -18.7                                           | 41.628009 | -70.395847 |
